# Supplementary material
Source: PubMed Central journal article supplement (PMC6700731)

Fig. S2

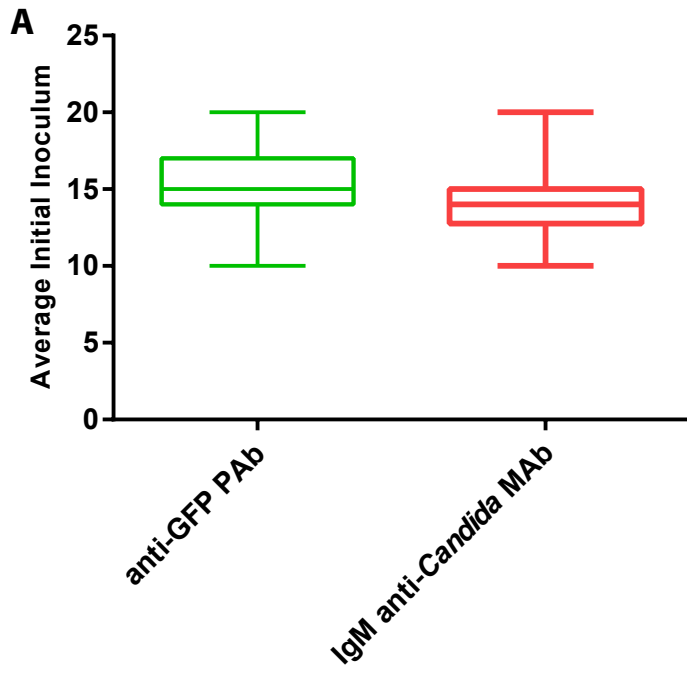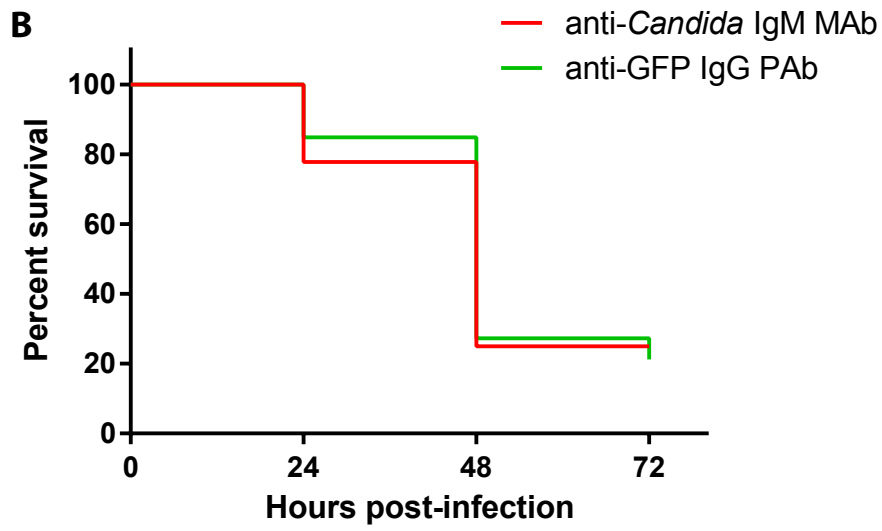

Supplement: NIHMS1004716-supplement-Suppl2.pdf [file NIHMS1004716-supplement-Suppl2.pdf]
